# Supplementary material for: Electronic structure and transport properties of 2D RhTeCl: a NEGF-DFT study
Source: Royal Society of Chemistry journal article supplement (doi:10.1039/c9nr07684k), 2019-01-01
Supplement: c9nr07684k1.pdf [file c9nr07684k1.pdf]

Supplementary Material for

### **Electronic structure and transport properties of 2D RhTeCl: A NEGF-DFT study**

Hengze Qu,<sup>a</sup> Shiyong Guo,<sup>a</sup> Wenhan Zhou,<sup>a</sup> Bo Cai,<sup>a</sup> Shengli Zhang,<sup>\*a</sup>  
Yaxin Huang,<sup>a</sup> Zhi Li,<sup>a</sup> Xianping Chen<sup>b</sup> and Haibo Zeng<sup>\*a</sup>

<sup>a</sup>Key Laboratory of Advanced Display Materials and Devices, Ministry of Industry and Information Technology, College of Material Science and Engineering, Nanjing University of Science and Technology, Nanjing 210094, China

<sup>b</sup>Key Laboratory of Optoelectronic Technology and Systems, Education Ministry of China, Chongqing University and College of Optoelectronic Engineering, Chongqing University, Chongqing 400044, China.

*\*Correspondence emails:* zhangslvip@njust.edu.cn; zeng.haibo@njust.edu.cn

**Fig. S1.** Side view of optimized bulk RhTeCl along b and a directions. L and  $d_0$  represent the thickness of each layer and the van der Waals gap, respectively.

**Fig. S2.** Top and side views of snapshot for  $5 \times 4 \times 1$  monolayer RhTeCl at 10 ps of the molecular dynamics simulations.

**Fig. S3.** The electronic band structure of bulk RhTeCl at PBE level.

**Fig. S4.** Electronic band structures of monolayer RhTeCl calculated in the basic of (a) PBE and (b) HSE06 when considering with SOC.

**Fig. S5.** (a) Strain-total energy relations and the energy shifts of (b) CBM and (c) CBM with respect the vacuum energy under uniaxial strain along the a and b directions for RhTeCl monolayer ( $\Delta l$  refers to the dilation along a or b, whereas  $l_0$  refers to the lattice constant of a or b at equilibrium geometry).

**Fig. S6** Change of the LDOS and the spectral current under a  $V_{gs}$  variation of 0.2 V in the double-gate monolayer RhTeCl n-MOSFET with  $L_g = 6$  nm.

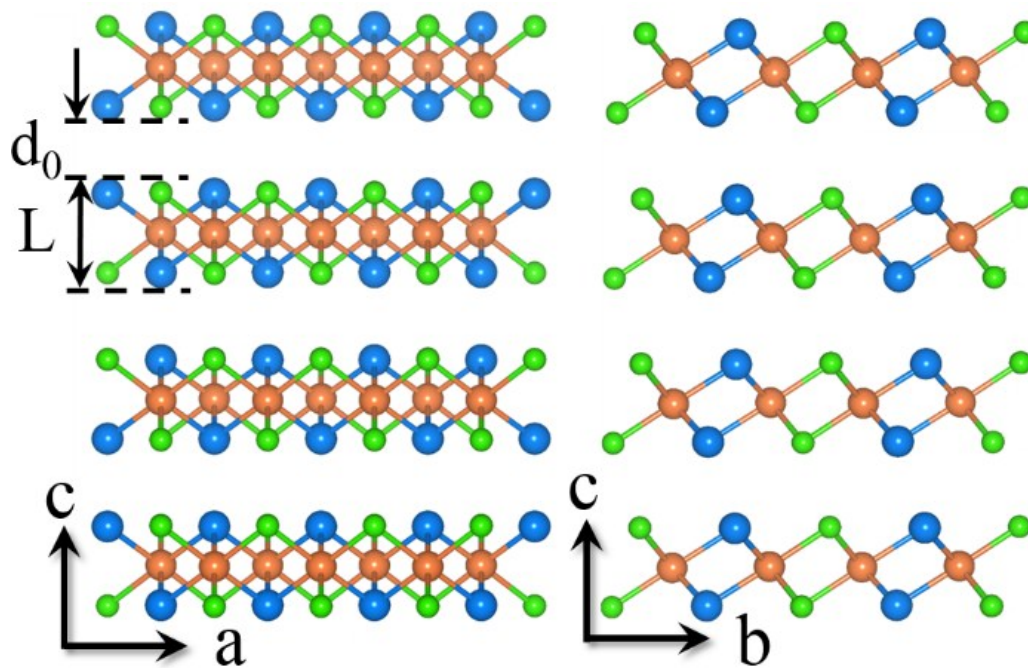

**Fig. S1.** Side view of optimized bulk RhTeCl along *b* and *a* directions.  $L$  and  $d_0$  represent the thickness of each layer and the van der Waals gap, respectively.

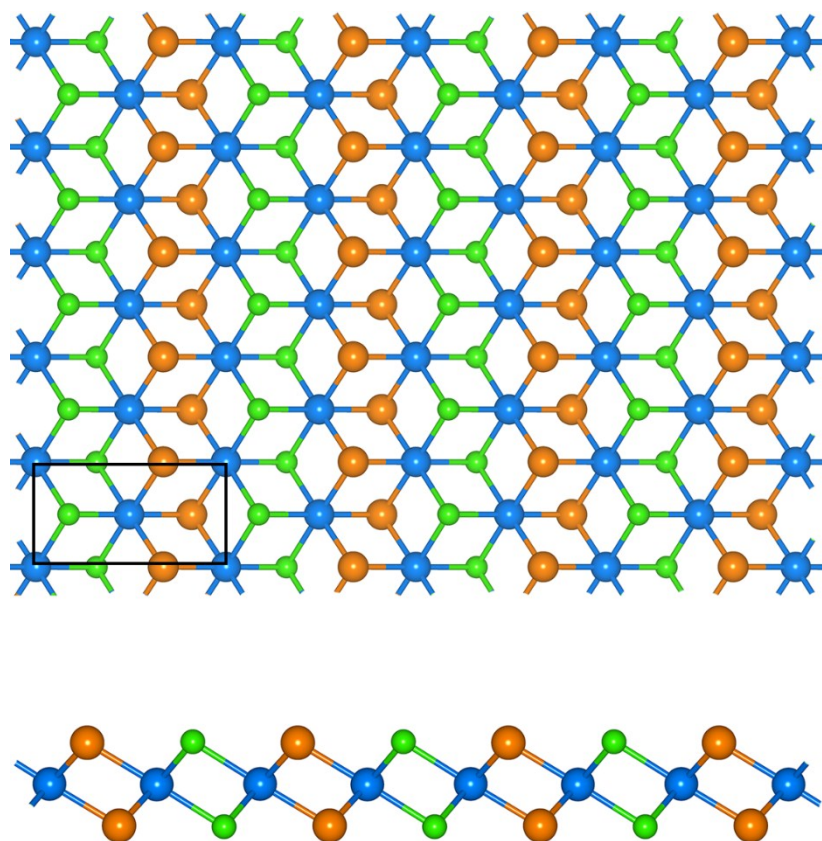

**Fig. S2.** Top and side views of snapshot for  $5 \times 4 \times 1$  monolayer RhTeCl at 10 ps of the molecular dynamics simulations.

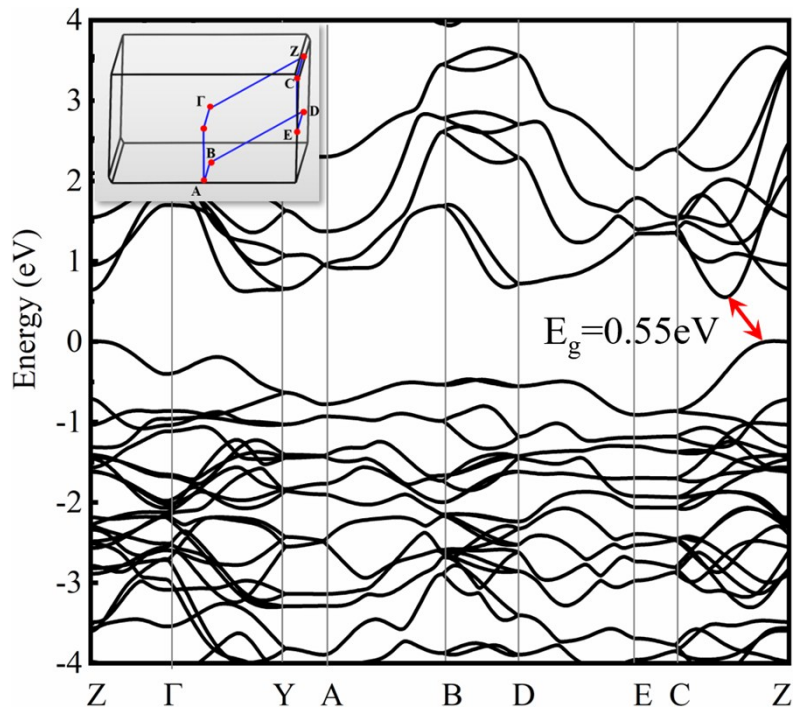

**Fig. S3.** The electronic band structure of bulk RhTeCl at PBE level.

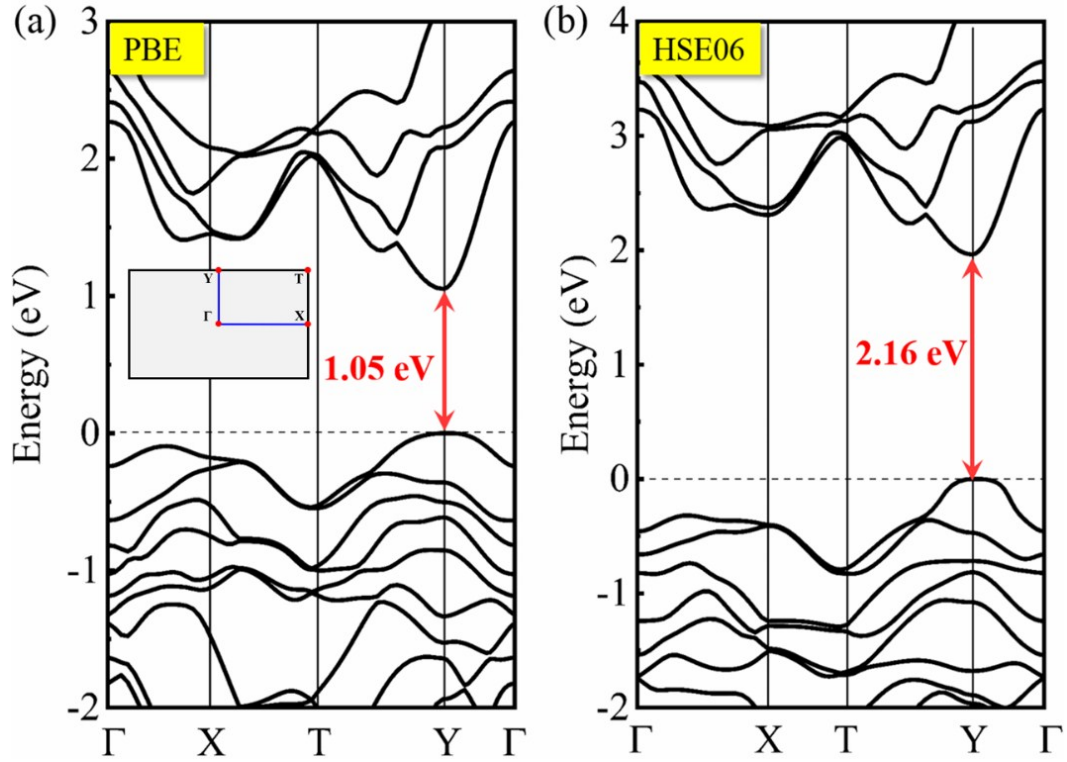

**Fig. S4.** Electronic band structures of monolayer RhTeCl calculated in the basis of (a) PBE and (b) HSE06 when considering with SOC.

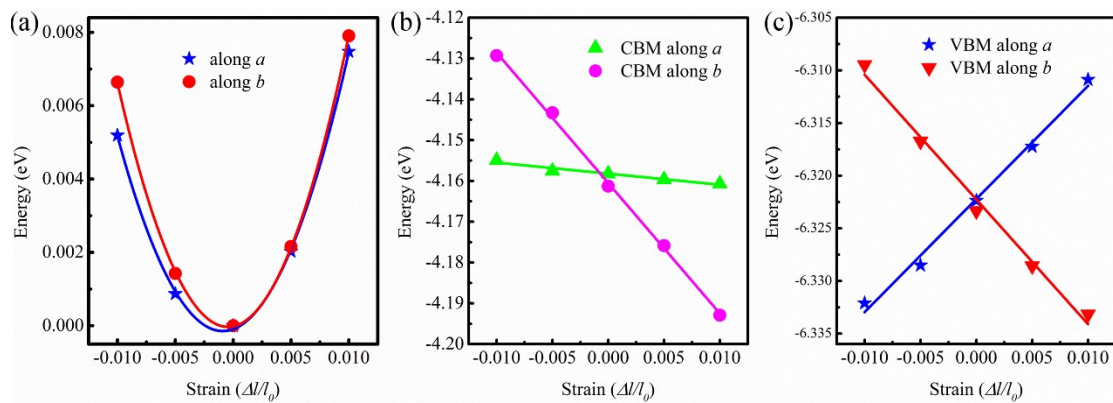

**Fig. S5.** (a) Strain-total energy relations and the energy shifts of (b) CBM and (c) CBM with respect the vacuum energy under uniaxial strain along the a and b directions for RhTeCl monolayer ( $\Delta l$  refers to the dilation along a or b, whereas  $l_0$  refers to the lattice constant of a or b at equilibrium geometry).

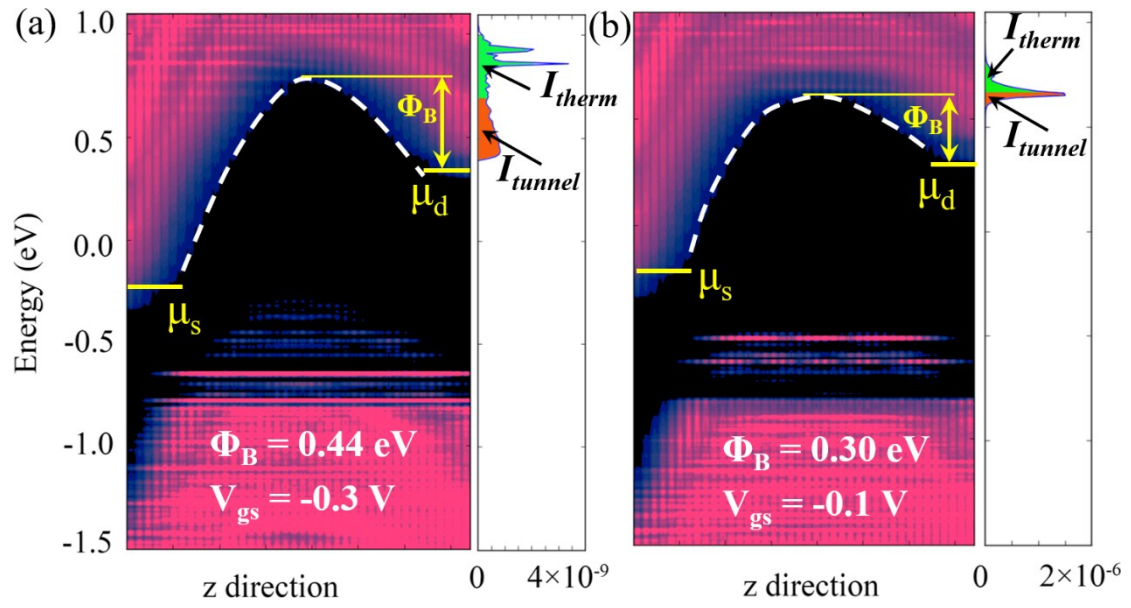

**Fig. S6** Change of the LDOS and the spectral current under a  $V_{gs}$  variation of 0.2 V in the double-gate monolayer RhTeCl n-MOSFET with  $L_g = 6 \text{ nm}$ .
